# Supplementary material for: Generation of Brain Microvascular Endothelial-Like Cells from Human Induced Pluripotent Stem Cells by Co-Culture with C6 Glioma Cells
Source: PubMed Central journal article supplement (PMC4464886; doi:10.1371/journal.pone.0128890), 2015-06-10

Supplemental Figure 2 Minami H et al.

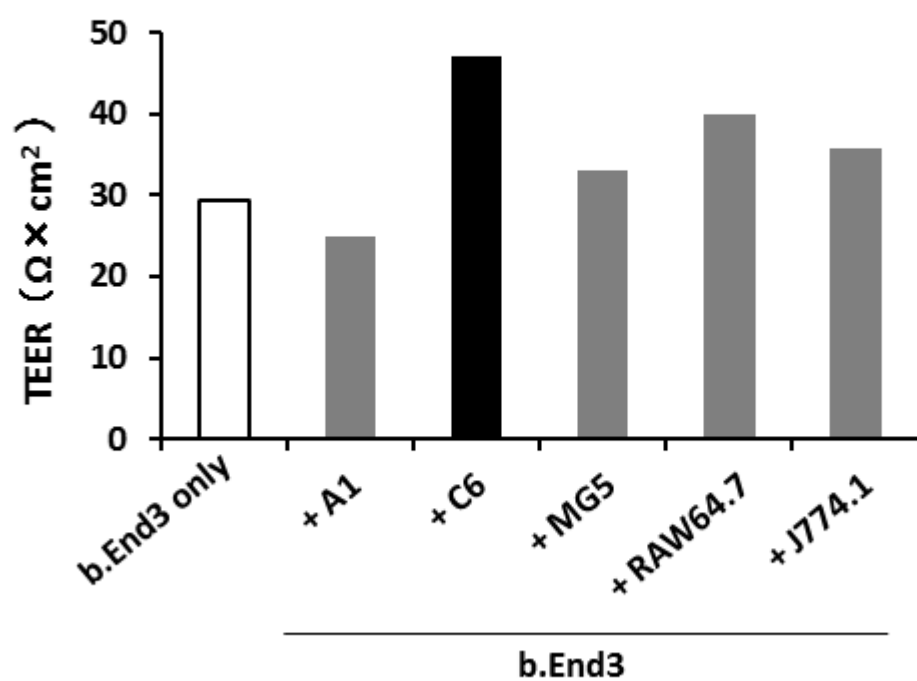

Supplement: pone.0128890.s002.pdf [file pone.0128890.s002.pdf]
